# Supplementary material for: Elemental composition as a tool for the assessment of type, seasonal variability, and geographical origin of wine and its contribution to daily elemental intake
Source: Royal Society of Chemistry journal article supplement (doi:10.1039/c6ra25105f), 2017-01-01
Supplement: c6ra25105f1.pdf [file c6ra25105f1.pdf]

Supplementary information

**Elemental composition as a tool for the assessment of type, seasonal variability, and geographical origin of wine and its contribution to daily elemental intake**

Sladana Đurđić<sup>a</sup>, Milica Pantelić<sup>b</sup>, Jelena Trifković<sup>a</sup>, Vesna Vukojević<sup>a</sup>, Maja Natić<sup>a</sup>, Živoslav Tešić<sup>a</sup> and Jelena Mutić<sup>a,c\*</sup>

<sup>a</sup>University of Belgrade - Faculty of Chemistry, P.O. Box 51, 11158 Belgrade, Serbia

<sup>b</sup>Innovation Centre of Faculty of Chemistry Ltd, Studentski trg 12-16, 11000, Belgrade, Serbia

<sup>c</sup>Ghent University Global Campus, Incheon, South Korea

\*Corresponding author (jmutic@chem.bg.ac.rs, tel/fax: +38113336745)

Content

**Table S1.** Region, vineyard, winery, wine sample and year of production

**Table S2.** Instrument operating conditions for ICP-OES and ICP-Q-MS

**Table S3.** Concentration of major and trace metals in wines from different viticulture countries

**Table S4.** Pearson's correlation coefficients between elements in white wines.

**Table S5.** Pearson's correlation coefficients between elements in red wines.

**Table S6.** Statistical parameters of PCA models

**Table S1.** Region, vineyard, winery, wine sample and year of production

| Region          | Wine region             | Winery      | Wine sample                       | Year of production |
|-----------------|-------------------------|-------------|-----------------------------------|--------------------|
| <b>Belgrade</b> | Smederevo               | Radmilovac  | Burgundac crni A                  | 2012               |
|                 |                         | Radmilovac  | Burgundac crni B                  | 2012               |
|                 |                         | Radmilovac  | Burgundac sivi                    | 2012               |
|                 |                         | Radmilovac  | Burgundac                         | 2013               |
|                 |                         | Radmilovac  | Burgundac                         | 2014               |
|                 |                         | Radmilovac  | Cabernet Franc                    | 2012               |
|                 |                         | Radmilovac  | Cabernet Franc-standard           | 2013               |
|                 |                         | Radmilovac  | Cabernet Franc-02*                | 2013               |
|                 |                         | Radmilovac  | Cabernet Franc-010*               | 2013               |
|                 |                         | Radmilovac  | Cabernet Franc-012*               | 2013               |
|                 |                         | Radmilovac  | Cabernet Franc                    | 2013               |
|                 |                         | Radmilovac  | Cabernet Franc                    | 2014               |
|                 |                         | Radmilovac  | Cabernet Sauvignon                | 2012               |
|                 |                         | Radmilovac  | Cabernet Sauvignon                | 2013               |
|                 |                         | Radmilovac  | Cabernet Sauvignon                | 2014               |
|                 |                         | Radmilovac  | Chardonnay <sup>w</sup>           | 2012               |
|                 |                         | Radmilovac  | Chardonnay <sup>w</sup>           | 2013               |
|                 |                         | Radmilovac  | Chardonnay <sup>w</sup>           | 2014               |
|                 |                         | Radmilovac  | Merlot                            | 2012               |
|                 |                         | Radmilovac  | Merlot-standard                   | 2013               |
|                 |                         | Radmilovac  | Merlot-022*                       | 2013               |
|                 |                         | Radmilovac  | Merlot-025*                       | 2013               |
|                 |                         | Radmilovac  | Merlot-029*                       | 2013               |
|                 |                         | Radmilovac  | Merlot                            | 2013               |
|                 |                         | Radmilovac  | Merlot                            | 2014               |
|                 |                         | Radmilovac  | Petra <sup>w</sup>                | 2012               |
|                 |                         | Radmilovac  | Prokupac                          | 2012               |
|                 |                         | Radmilovac  | Riesling Italijanski <sup>w</sup> | 2012               |
|                 |                         | Radmilovac  | Riesling Italijanski <sup>w</sup> | 2013               |
|                 |                         | Radmilovac  | Riesling Rajnski <sup>w</sup>     | 2012               |
|                 |                         | Radmilovac  | Riesling Rajnski <sup>w</sup>     | 2013               |
|                 |                         | Radmilovac  | Riesling Rajnski <sup>w</sup>     | 2014               |
|                 |                         | Radmilovac  | Sangiovese                        | 2012               |
|                 |                         | Radmilovac  | Sauvignon Blanc <sup>w</sup>      | 2012               |
|                 |                         | Radmilovac  | Sauvignon Blanc <sup>w</sup>      | 2013               |
|                 |                         | Radmilovac  | Sauvignon Blanc <sup>w</sup>      | 2014               |
| Radmilovac      | Smederevka <sup>w</sup> | 2014        |                                   |                    |
| Radmilovac      | Shiraz                  | 2012        |                                   |                    |
| <b>Central</b>  | Topola                  | Radovanović | Cabernet Sauvignon                | 2010               |
|                 | Topola                  | Radovanović | Cabernet Sauvignon                | 2011               |

|                     |             |                |                            |      |
|---------------------|-------------|----------------|----------------------------|------|
| <b>Serbia</b>       | Negotin     | Dajić          | Cabernet Sauvignon         | 2009 |
|                     | Negotin     | Tanica pimnice | Cabernet Sauvignon         | 2011 |
|                     | Negotin     | Dajić          | Game                       | 2009 |
|                     | Župa        | Rubin          | Merlot-Tarra Lazarica      | 2009 |
|                     | Župa        | Vino Budimir   | Prokupac-Triada            | 2006 |
|                     | Župa        | Vino Budimir   | Tamjanika                  | 2014 |
|                     | Župa        | Radmilovac     | Plovdina                   | 2014 |
|                     | Knjaževac   | Jović          | Vranac Potkranjski         | 2009 |
| <b>Vojvodina</b>    | Palić       | Čoka           | Cabernet Sauvignon-Lederer | 2010 |
|                     | Palić       | Čoka           | Cabernet Sauvignon         | 2011 |
|                     | Palić       | Čoka           | Merlot-Lederer             | 2010 |
|                     | Palić       | Čoka           | Merlot                     | 2011 |
|                     | Vršac       | Radmilovac     | Merlot                     | 2014 |
|                     | Fruška gora | Radmilovac     | Prokupac sremski           | 2014 |
| <b>South Serbia</b> | Prokuplje   | Stari dani     | Cabernet Sauvignon         | 2009 |
|                     | Prokuplje   | Stari dani     | Cabernet Sauvignon         | 2014 |
|                     | Prokuplje   | Petrović       | Carsko crveno              | 2011 |
|                     | Prokuplje   | Petrović       | Cabernet Sauvignon         | 2012 |
|                     | Prokuplje   | Petrović       | Cabernet Sauvignon         | 2011 |
|                     | Prokuplje   | Petrović       | Prokupac                   | 2011 |
|                     | Prokuplje   | Radmilovac     | Crna Tamjanika             | 2014 |
|                     | Prokuplje   | Stari dani     | Prokupac                   | 2014 |
|                     | Prokuplje   | Stari dani     | Vranac                     | 2014 |

<sup>w</sup> White wines, all other are red wines

\* Clones: Merlot namely No 022, 025 and 029 and Cabernet Franc No 02, 010 and 012

**Table S2.** Instrument operating conditions for ICP-OES and ICP-Q-MS

| <b>ICP- OES</b>                         |                                                                                                                                                                                         |
|-----------------------------------------|-----------------------------------------------------------------------------------------------------------------------------------------------------------------------------------------|
| Nebulizer                               | Concentric                                                                                                                                                                              |
| Spray chamber                           | Cyclonic                                                                                                                                                                                |
| Rf power (W)                            | 1150                                                                                                                                                                                    |
| Principal argon flow rate (L/min)       | 12                                                                                                                                                                                      |
| Auxiliary argon flow rate (L/min)       | 0.5                                                                                                                                                                                     |
| Nebulizer argon flow rate (L/min)       | 0.5                                                                                                                                                                                     |
| Sample flow rate (mL/min)               | 1.0                                                                                                                                                                                     |
| Selected wavelengths (nm)               | Fe (259.9); Na (589.5); Ca (373.6); Mg (279.5);<br>K (766.4); Rb (780.0)                                                                                                                |
| Detection limits (µg/L)                 | Fe (0.2); Na (0.2); Ca (0.3); Mg (0.2); K (0.4);<br>Rb (0.1)                                                                                                                            |
| <b>ICP- OES (hydride generation)</b>    |                                                                                                                                                                                         |
| Reductor                                | 0.1% NaBH <sub>4</sub> in 0.5% NaOH                                                                                                                                                     |
| Acid                                    | 8.0 mol/dm <sup>3</sup> HCl                                                                                                                                                             |
| Carrier flow rate (L/min)               | 0.4                                                                                                                                                                                     |
| Rf power (W)                            | 1150                                                                                                                                                                                    |
| Wavelengths (nm) of As                  | 189.0                                                                                                                                                                                   |
| Detection limits (µg/L)                 | 0.05                                                                                                                                                                                    |
| <b>ICP-Q-MS</b>                         |                                                                                                                                                                                         |
| Rf power (W)                            | 1548                                                                                                                                                                                    |
| Gas flows (L/min)                       | 13.9;1.09;0.8                                                                                                                                                                           |
| Acquisition time                        | 3 x 50s                                                                                                                                                                                 |
| Points per peak                         | 3                                                                                                                                                                                       |
| Dwell time (ns)                         | 10                                                                                                                                                                                      |
| Detector mode                           | Pulse                                                                                                                                                                                   |
| Measured isotopes (normal mode)         | <sup>9</sup> Be, <sup>27</sup> Al, <sup>51</sup> V, <sup>59</sup> Co, <sup>60</sup> Ni, <sup>66</sup> Zn, <sup>111</sup> Cd, <sup>121</sup> Sb,<br><sup>137</sup> Ba, <sup>208</sup> Pb |
| Measured isotopes (collision cell mode) | <sup>52</sup> Cr, <sup>55</sup> Mn, <sup>78</sup> Se                                                                                                                                    |
| Detection limits (µg/L)                 | Be (0.1), Al (2.0), V (0.02), Co (0.02), Ni (0.3),<br>Zn (0.4), Cd (0.05), Sb (0.08), Ba (0.02), Pb<br>(0.1), Cr (0.3), Mn (0.4), Se (0.2)                                              |



**Table S4.** Pearson's correlation coefficients (*r*) between elements in white wines

|           | As            | Ba           | Be           | Cd           | Co            | Cr     | Ni     | Pb           | Sb     | Se     | V            | Al     | Mn           | Zn           | Cu     | Ca           | Fe     | K      | Mg     | Na    | Rb    |  |
|-----------|---------------|--------------|--------------|--------------|---------------|--------|--------|--------------|--------|--------|--------------|--------|--------------|--------------|--------|--------------|--------|--------|--------|-------|-------|--|
| <b>As</b> | 1.000         |              |              |              |               |        |        |              |        |        |              |        |              |              |        |              |        |        |        |       |       |  |
| <b>Ba</b> | -0.671        | 1.000        |              |              |               |        |        |              |        |        |              |        |              |              |        |              |        |        |        |       |       |  |
| <b>Be</b> | -0.110        | 0.230        | 1.000        |              |               |        |        |              |        |        |              |        |              |              |        |              |        |        |        |       |       |  |
| <b>Cd</b> | 0.113         | -0.427       | -0.040       | 1.000        |               |        |        |              |        |        |              |        |              |              |        |              |        |        |        |       |       |  |
| <b>Co</b> | 0.271         | -0.359       | -0.221       | -0.266       | 1.000         |        |        |              |        |        |              |        |              |              |        |              |        |        |        |       |       |  |
| <b>Cr</b> | 0.409         | -0.290       | -0.093       | 0.332        | 0.074         | 1.000  |        |              |        |        |              |        |              |              |        |              |        |        |        |       |       |  |
| <b>Ni</b> | -0.052        | -0.350       | 0.180        | 0.417        | -0.199        | 0.294  | 1.000  |              |        |        |              |        |              |              |        |              |        |        |        |       |       |  |
| <b>Pb</b> | 0.444         | -0.414       | 0.140        | <b>0.607</b> | -0.286        | 0.335  | 0.313  | 1.000        |        |        |              |        |              |              |        |              |        |        |        |       |       |  |
| <b>Sb</b> | -0.100        | -0.005       | 0.209        | -0.201       | 0.047         | 0.218  | 0.309  | -0.043       | 1.000  |        |              |        |              |              |        |              |        |        |        |       |       |  |
| <b>Se</b> | -0.009        | 0.114        | 0.021        | -0.066       | -0.090        | 0.076  | 0.018  | 0.268        | -0.092 | 1.000  |              |        |              |              |        |              |        |        |        |       |       |  |
| <b>V</b>  | -0.315        | <b>0.620</b> | 0.288        | -0.055       | -0.394        | 0.082  | -0.215 | -0.233       | -0.308 | -0.181 | 1.000        |        |              |              |        |              |        |        |        |       |       |  |
| <b>Al</b> | -0.013        | 0.162        | <b>0.633</b> | 0.288        | <b>-0.619</b> | -0.214 | -0.043 | 0.144        | -0.219 | -0.109 | 0.422        | 1.000  |              |              |        |              |        |        |        |       |       |  |
| <b>Mn</b> | 0.251         | -0.184       | -0.256       | 0.233        | -0.258        | 0.237  | -0.359 | 0.150        | 0.185  | -0.126 | -0.072       | 0.221  | 1.000        |              |        |              |        |        |        |       |       |  |
| <b>Zn</b> | 0.377         | -0.293       | 0.075        | 0.414        | -0.221        | 0.326  | 0.207  | <b>0.918</b> | -0.079 | 0.292  | -0.105       | 0.000  | 0.084        | 1.000        |        |              |        |        |        |       |       |  |
| <b>Cu</b> | 0.300         | -0.344       | 0.007        | 0.392        | -0.268        | 0.198  | 0.338  | <b>0.882</b> | -0.050 | 0.460  | -0.297       | -0.057 | 0.041        | <b>0.925</b> | 1.000  |              |        |        |        |       |       |  |
| <b>Ca</b> | 0.299         | -0.340       | -0.127       | 0.463        | <b>-0.607</b> | 0.148  | 0.054  | 0.522        | -0.003 | 0.033  | -0.126       | 0.394  | <b>0.740</b> | 0.382        | 0.447  | 1.000        |        |        |        |       |       |  |
| <b>Fe</b> | 0.002         | -0.005       | -0.131       | 0.406        | -0.479        | 0.053  | -0.174 | 0.199        | 0.038  | -0.326 | 0.349        | 0.365  | <b>0.687</b> | 0.169        | 0.081  | <b>0.639</b> | 1.000  |        |        |       |       |  |
| <b>K</b>  | -0.040        | 0.476        | 0.288        | -0.369       | -0.082        | -0.111 | -0.293 | -0.033       | 0.137  | 0.392  | 0.195        | 0.118  | -0.025       | 0.092        | 0.094  | -0.258       | -0.021 | 1.000  |        |       |       |  |
| <b>Mg</b> | 0.247         | -0.444       | -0.473       | 0.140        | -0.052        | 0.463  | 0.136  | 0.266        | 0.274  | -0.153 | -0.243       | -0.374 | 0.470        | 0.283        | 0.258  | 0.508        | 0.348  | -0.438 | 1.000  |       |       |  |
| <b>Na</b> | <b>-0.647</b> | <b>0.562</b> | 0.239        | 0.043        | -0.341        | -0.024 | 0.321  | -0.187       | 0.055  | -0.314 | <b>0.610</b> | 0.075  | -0.471       | -0.123       | -0.228 | -0.336       | 0.053  | -0.132 | -0.136 | 1.000 |       |  |
| <b>Rb</b> | -0.253        | 0.107        | -0.370       | 0.027        | 0.159         | 0.176  | 0.092  | -0.020       | 0.139  | 0.196  | -0.037       | -0.550 | -0.201       | -0.048       | -0.035 | -0.218       | 0.024  | -0.081 | 0.365  | 0.268 | 1.000 |  |

Correlation is significant at 99% confidence level ( $r_{\text{critical}} = 0.560$ ,  $n = 17$ )

**Table S5.** Pearson's correlation coefficients (*r*) between elements in red wines

|           | As            | Ba           | Be           | Cd           | Co     | Cr            | Ni           | Pb           | Sb     | Se            | V            | Al     | Mn           | Zn           | Cu     | Ca     | Fe     | K             | Mg    | Na     | Rb    |  |
|-----------|---------------|--------------|--------------|--------------|--------|---------------|--------------|--------------|--------|---------------|--------------|--------|--------------|--------------|--------|--------|--------|---------------|-------|--------|-------|--|
| <b>As</b> | 1.000         |              |              |              |        |               |              |              |        |               |              |        |              |              |        |        |        |               |       |        |       |  |
| <b>Ba</b> | <b>-0.469</b> | 1.000        |              |              |        |               |              |              |        |               |              |        |              |              |        |        |        |               |       |        |       |  |
| <b>Be</b> | -0.191        | <b>0.622</b> | 1.000        |              |        |               |              |              |        |               |              |        |              |              |        |        |        |               |       |        |       |  |
| <b>Cd</b> | 0.091         | -0.014       | 0.073        | 1.000        |        |               |              |              |        |               |              |        |              |              |        |        |        |               |       |        |       |  |
| <b>Co</b> | -0.002        | 0.181        | 0.195        | 0.175        | 1.000  |               |              |              |        |               |              |        |              |              |        |        |        |               |       |        |       |  |
| <b>Cr</b> | <b>-0.578</b> | <b>0.546</b> | <b>0.568</b> | 0.074        | 0.104  | 1.000         |              |              |        |               |              |        |              |              |        |        |        |               |       |        |       |  |
| <b>Ni</b> | <b>-0.429</b> | <b>0.705</b> | <b>0.503</b> | -0.002       | 0.196  | <b>0.421</b>  | 1.000        |              |        |               |              |        |              |              |        |        |        |               |       |        |       |  |
| <b>Pb</b> | -0.030        | 0.022        | 0.104        | <b>0.753</b> | 0.339  | 0.092         | 0.135        | 1.000        |        |               |              |        |              |              |        |        |        |               |       |        |       |  |
| <b>Sb</b> | -0.116        | 0.053        | 0.015        | -0.019       | 0.239  | 0.171         | 0.110        | 0.042        | 1.000  |               |              |        |              |              |        |        |        |               |       |        |       |  |
| <b>Se</b> | <b>0.430</b>  | -0.237       | -0.242       | 0.026        | 0.028  | <b>-0.412</b> | -0.149       | -0.104       | -0.202 | 1.000         |              |        |              |              |        |        |        |               |       |        |       |  |
| <b>V</b>  | -0.131        | 0.308        | 0.641        | 0.004        | 0.090  | <b>0.452</b>  | 0.070        | 0.098        | -0.057 | -0.156        | 1.000        |        |              |              |        |        |        |               |       |        |       |  |
| <b>Al</b> | -0.240        | 0.327        | <b>0.531</b> | -0.072       | 0.082  | <b>0.503</b>  | 0.258        | -0.021       | 0.187  | -0.192        | 0.425        | 1.000  |              |              |        |        |        |               |       |        |       |  |
| <b>Mn</b> | <b>-0.441</b> | <b>0.752</b> | <b>0.443</b> | 0.021        | 0.246  | <b>0.475</b>  | <b>0.511</b> | 0.056        | -0.019 | <b>-0.377</b> | 0.334        | 0.261  | 1.000        |              |        |        |        |               |       |        |       |  |
| <b>Zn</b> | -0.052        | 0.072        | 0.085        | -0.178       | 0.047  | 0.140         | 0.225        | 0.193        | 0.238  | -0.053        | -0.032       | 0.259  | -0.123       | 1.000        |        |        |        |               |       |        |       |  |
| <b>Cu</b> | -0.127        | 0.024        | 0.020        | -0.011       | 0.223  | 0.046         | 0.282        | <b>0.546</b> | 0.210  | -0.065        | 0.017        | 0.134  | -0.060       | <b>0.624</b> | 1.000  |        |        |               |       |        |       |  |
| <b>Ca</b> | <b>0.444</b>  | -0.076       | -0.008       | 0.121        | 0.071  | -0.322        | -0.171       | 0.095        | -0.051 | 0.347         | 0.024        | 0.047  | -0.119       | 0.299        | 0.090  | 1.000  |        |               |       |        |       |  |
| <b>Fe</b> | 0.170         | -0.252       | 0.046        | 0.098        | -0.183 | -0.022        | -0.234       | 0.035        | 0.054  | -0.052        | 0.219        | 0.084  | -0.060       | 0.213        | -0.026 | 0.254  | 1.000  |               |       |        |       |  |
| <b>K</b>  | -0.273        | 0.205        | 0.125        | -0.044       | -0.119 | 0.063         | 0.144        | -0.191       | -0.202 | 0.254         | 0.055        | -0.009 | 0.096        | -0.337       | -0.268 | -0.007 | -0.247 | 1.000         |       |        |       |  |
| <b>Mg</b> | 0.135         | -0.038       | 0.041        | 0.117        | 0.073  | 0.042         | -0.011       | 0.160        | 0.258  | -0.228        | 0.012        | 0.332  | 0.193        | <b>0.463</b> | 0.179  | 0.314  | 0.326  | <b>-0.496</b> | 1.000 |        |       |  |
| <b>Na</b> | <b>-0.399</b> | <b>0.520</b> | 0.360        | 0.008        | 0.035  | <b>0.440</b>  | 0.289        | 0.077        | -0.057 | -0.292        | <b>0.412</b> | 0.375  | <b>0.700</b> | -0.011       | -0.005 | -0.190 | 0.141  | 0.035         | 0.189 | 1.000  |       |  |
| <b>Rb</b> | -0.087        | -0.080       | -0.034       | 0.253        | 0.140  | 0.048         | -0.027       | 0.109        | 0.100  | 0.124         | -0.162       | 0.027  | -0.125       | -0.063       | -0.161 | 0.041  | -0.156 | 0.251         | 0.144 | -0.222 | 1.000 |  |

Correlation is significant at 99% confidence level ( $r_{\text{critical}} = 0.376$ ,  $n = 46$ )

**Table S6.** Statistical parameters of PCA models

|                             |              | <b>PC1</b> | <b>PC2</b> | <b>PC3</b> | <b>PC4</b> | <b>PC5</b> | <b>PC6</b> | <b>PC7</b> |
|-----------------------------|--------------|------------|------------|------------|------------|------------|------------|------------|
| <b>Wine type</b>            | Eigenvalues  | 5.14       | 3.20       | 2.32       | 1.64       | 1.38       | 1.21       | 1.09       |
|                             | Variance (%) | 24.48      | 15.24      | 11.07      | 7.79       | 6.56       | 5.76       | 5.19       |
| <b>Seasonal variability</b> | Eigenvalues  | 4.57       | 3.20       | 2.70       | 2.14       | 1.60       | 1.29       | 1.10       |
|                             | Variance (%) | 21.77      | 15.21      | 12.86      | 10.19      | 7.60       | 6.14       | 5.22       |
| <b>Regional origin</b>      | Eigenvalues  | 5.39       | 3.01       | 2.37       | 2.05       | 1.96       | 1.50       | 1.15       |
|                             | Variance (%) | 25.68      | 14.33      | 11.27      | 9.75       | 9.31       | 7.17       | 5.42       |
